# Supplementary material for: Efficient molecular ruthenium catalysts containing anionic ligands for water oxidation
Source: Royal Society of Chemistry journal article supplement (doi:10.1039/c6dt02056a), 2016-01-01
Supplement: c6dt02056a1.pdf [file c6dt02056a1.pdf]

## **Supporting Information**

for

### **Efficient Molecular Ruthenium Catalysts Containing Anionic Ligands for Water Oxidation**

Zhongkai Lu,<sup>a</sup> Yan Gao,<sup>\*,a</sup> Hong Chen,<sup>b</sup> Zhao Liu,<sup>a</sup> Lifang Chen,<sup>a</sup> Licheng Sun<sup>a, b</sup>

<sup>a</sup>State Key Laboratory of Fine Chemicals, Institute of Artificial Photosynthesis, DUT-KTH Joint Education and Research Center on Molecular Devices, Dalian University of Technology (DUT), Dalian 116024, China.

<sup>b</sup>Department of Chemistry, School of Chemical Science and Engineering, KTH Royal Institute of Technology, 100 44 Stockholm, Sweden.

Corresponding address:

E-mail: dr.gaoyan@dlut.edu.cn.

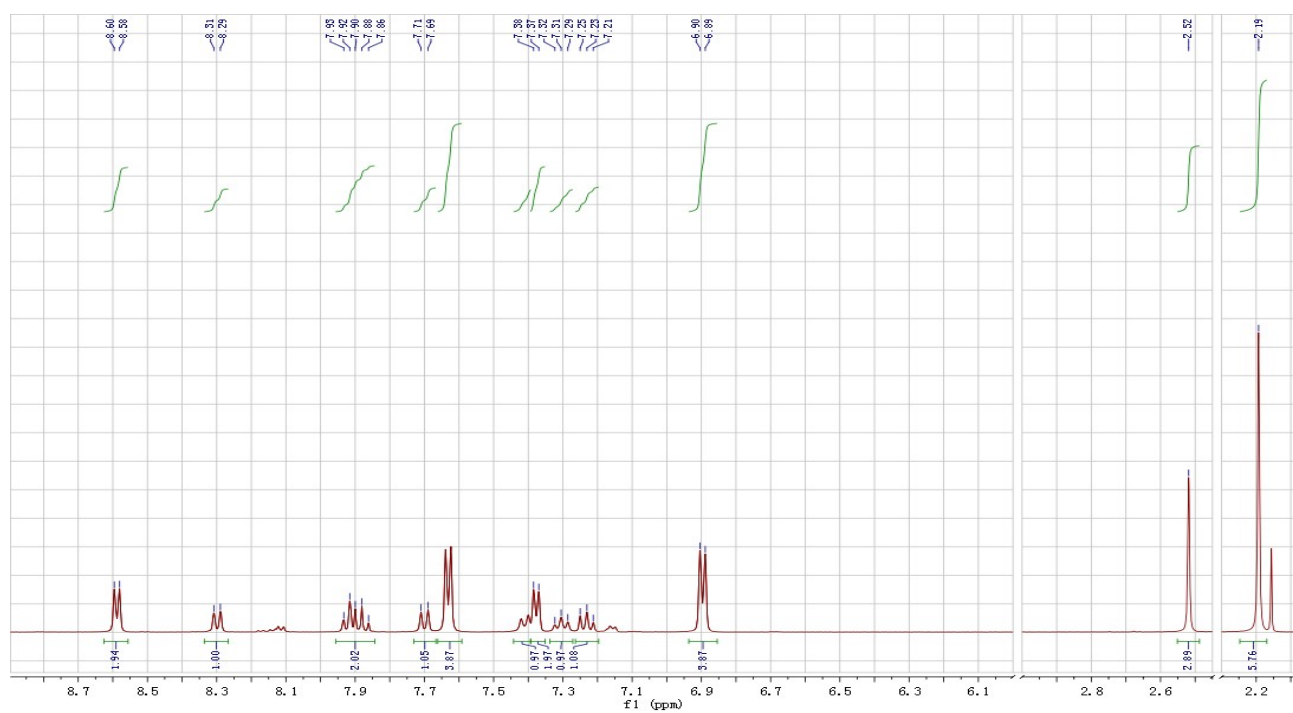

**Figure S1.** <sup>1</sup>H NMR of **1** in *d*<sub>4</sub>-methanol.

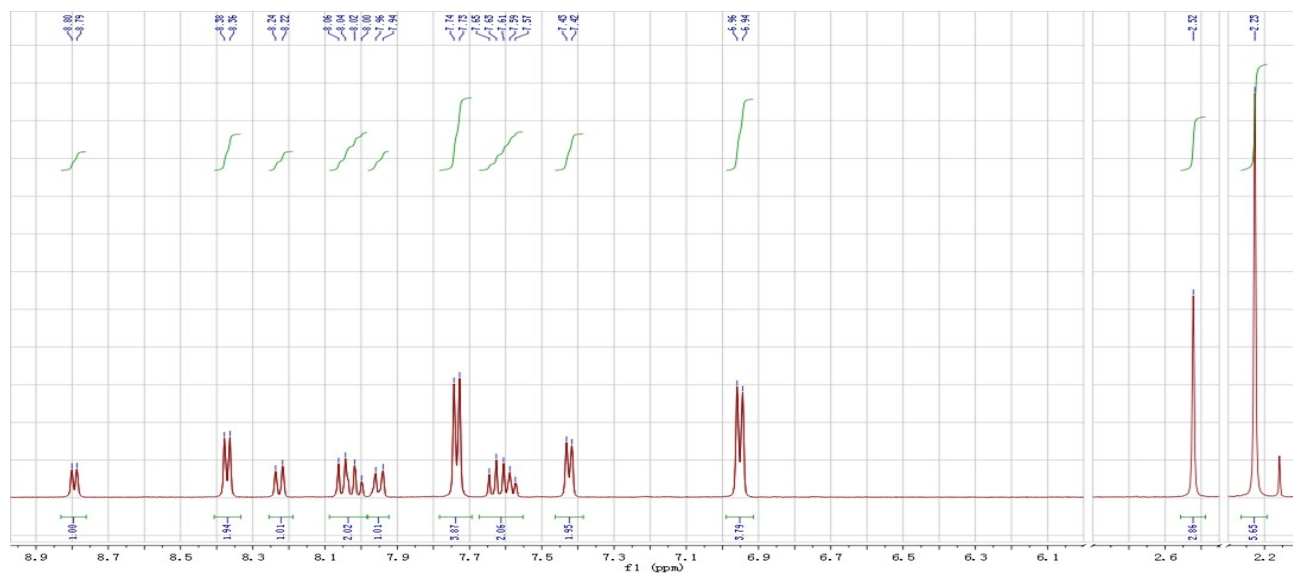

**Figure S2.** <sup>1</sup>H NMR of **2** in *d*<sub>4</sub>-methanol.

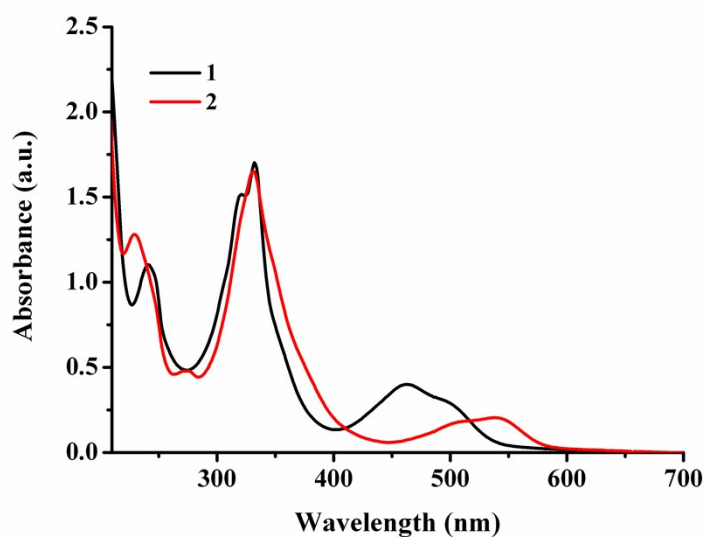

**Figure S3.** UV-vis absorption spectra of **1** and **2** in  $\text{CF}_3\text{CH}_2\text{OH}$  solution.

The UV-vis spectral changes of **1** and **2** upon variation of the pH from 4.28 to 8.03 were recorded in aqueous solutions (Figure S4 and S6). The  $\text{pK}_\text{a}$  values for  $[\text{1H}]^+$  and  $[\text{2H}]^+$  were calculated to be 6.43 and 6.67, by nonlinear sigmoidal fits to the absorption changes at 332 and 331 nm respectively, as illustrated in the Figure S5 and S7.

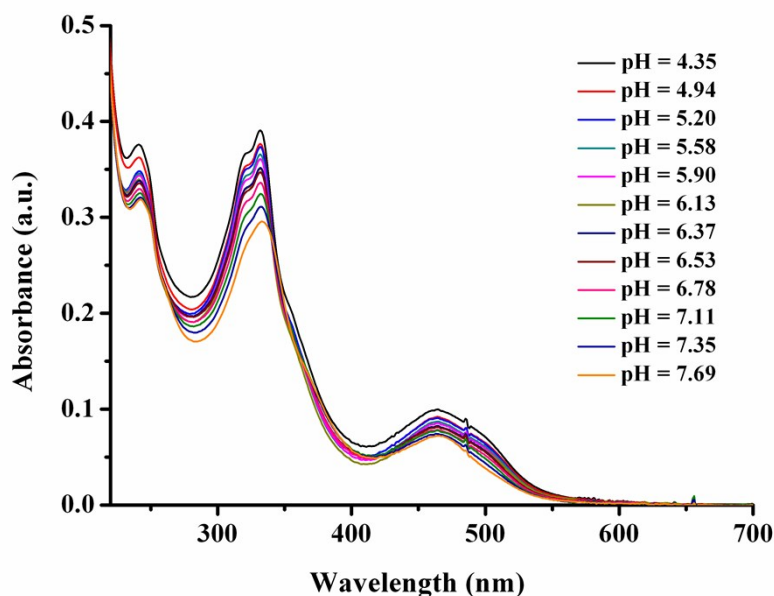

**Figure S4.** Spectrophotometric titration of **1** in  $\text{NaH}_2\text{PO}_4$  aqueous solution containing 10%  $\text{CF}_3\text{CH}_2\text{OH}$ . The pH value was adjusted by adding triflic acid or 1 M NaOH solution.

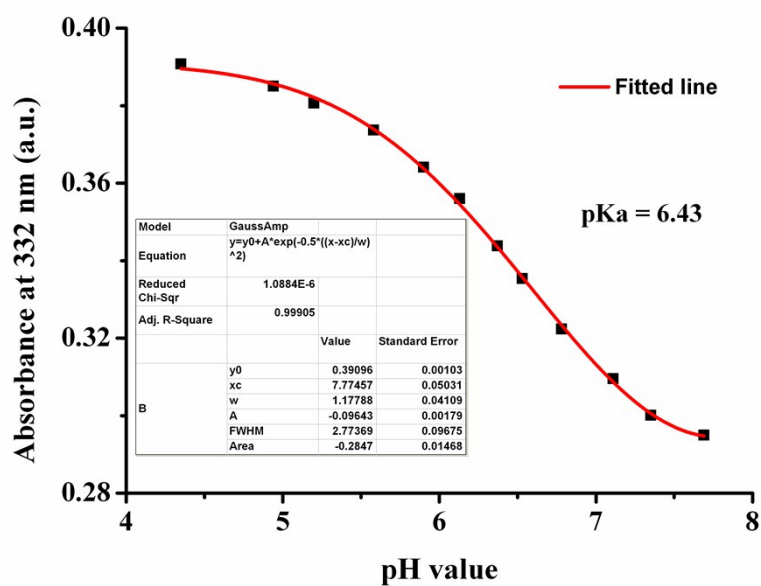

**Figure S5.** Determination of pKa of **1** by fitting the absorbance at 332 nm.

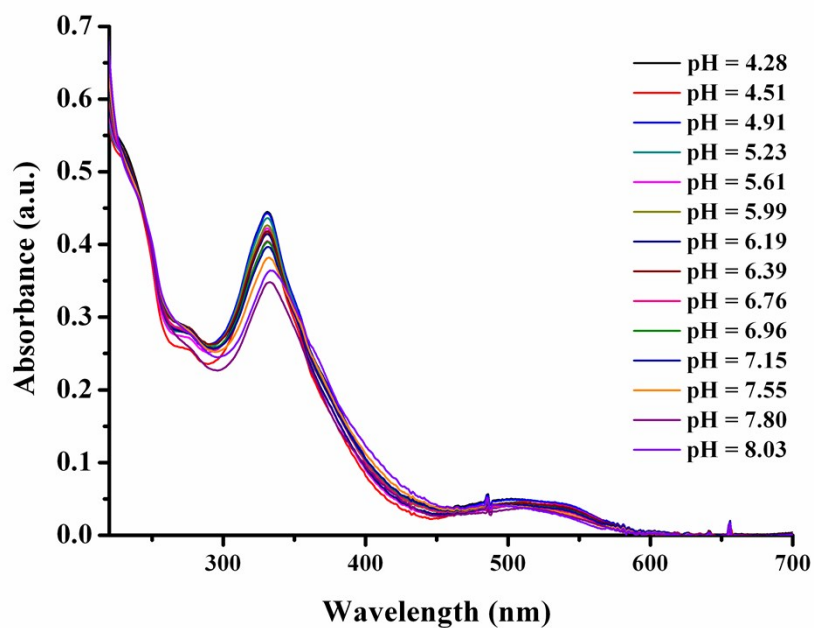

**Figure S6.** Spectrophotometric titration of **2** in  $\text{NaH}_2\text{PO}_4$  aqueous solution containing 10%  $\text{CF}_3\text{CH}_2\text{OH}$ . The pH value was adjusted by adding triflic acid or 1 M NaOH solution.

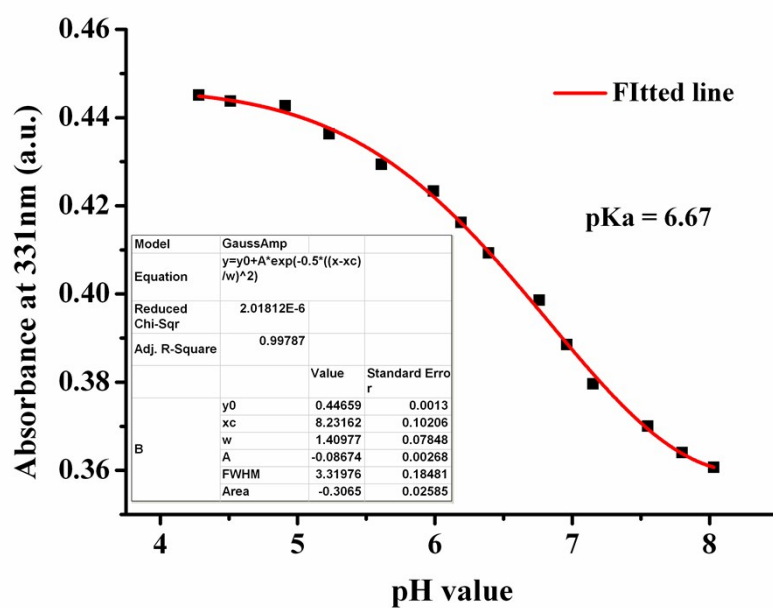

**Figure S7.** Determination of pKa of **2** by fitting the absorbance at 331 nm.

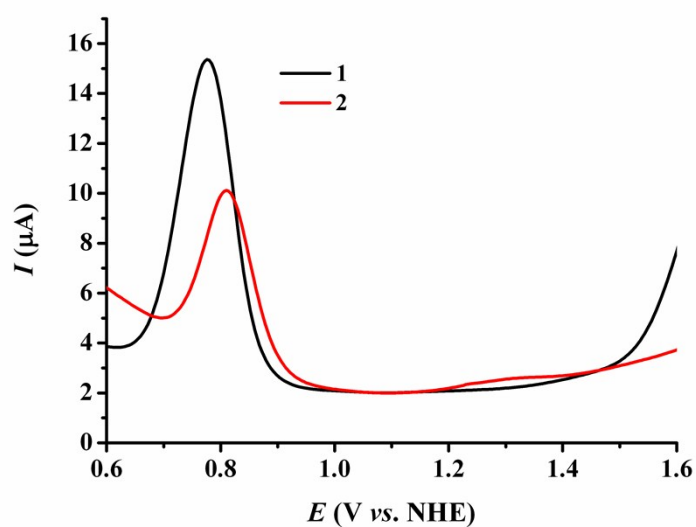

**Figure S8.** DPV curves of **1** and **2** in CF<sub>3</sub>SO<sub>3</sub>H (pH 1.0) containing 10% CF<sub>3</sub>CH<sub>2</sub>OH.

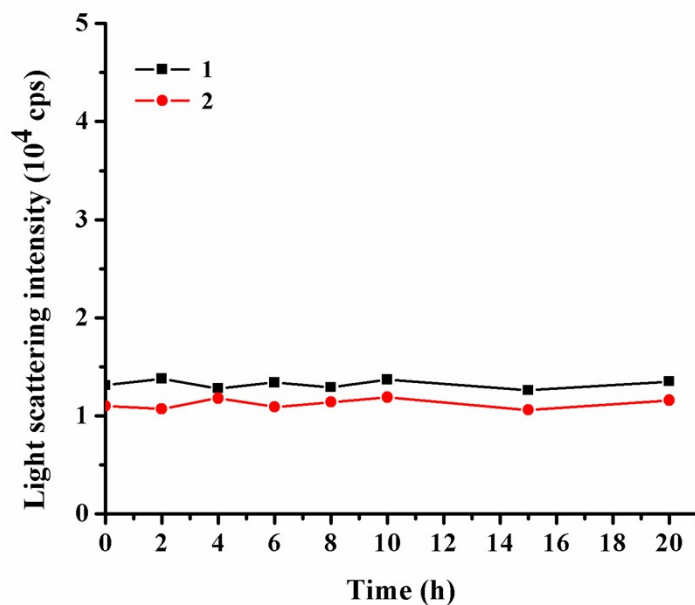

**Figure S9.** Light scattering intensity as a function of reaction time in an aqueous solution of  $\text{CF}_3\text{SO}_3\text{H}$  (pH 1.0) containing  $\text{Ce}^{\text{IV}}$  (0.2 M). black: 10  $\mu\text{M}$  **1**; red: 10  $\mu\text{M}$  **2**.

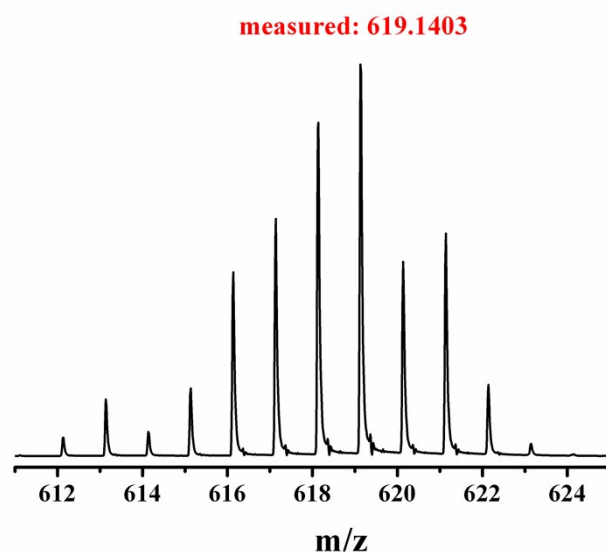

**Figure S10.** HRMS spectra (positive mode) of  $[\text{H}(\text{L1})(4\text{-picoline})_3\text{Ru}^{\text{II}}]^+$  (calculated: 619.1395). Condition: catalyst **1** in  $\text{CF}_3\text{CH}_2\text{OH}/\text{H}_2\text{O}$  (1:9).

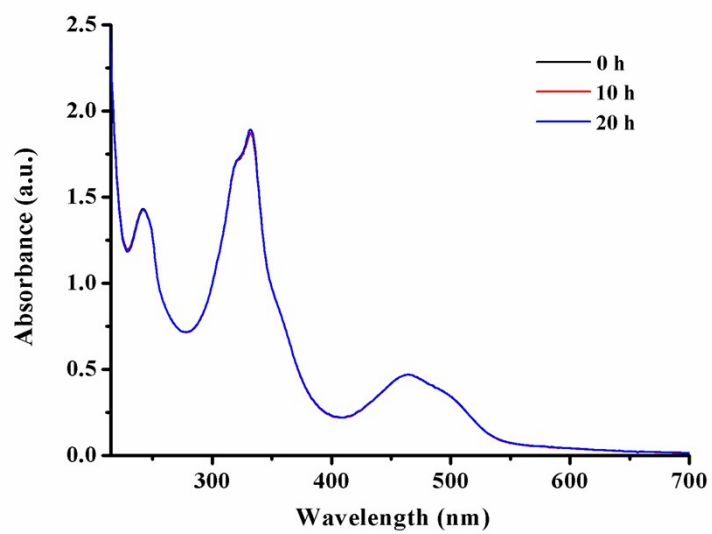

**Figure S11.** UV-vis absorption spectra of **1** in  $\text{CF}_3\text{SO}_3\text{H}$  aqueous solution (pH = 1.0) over a 20 h period.

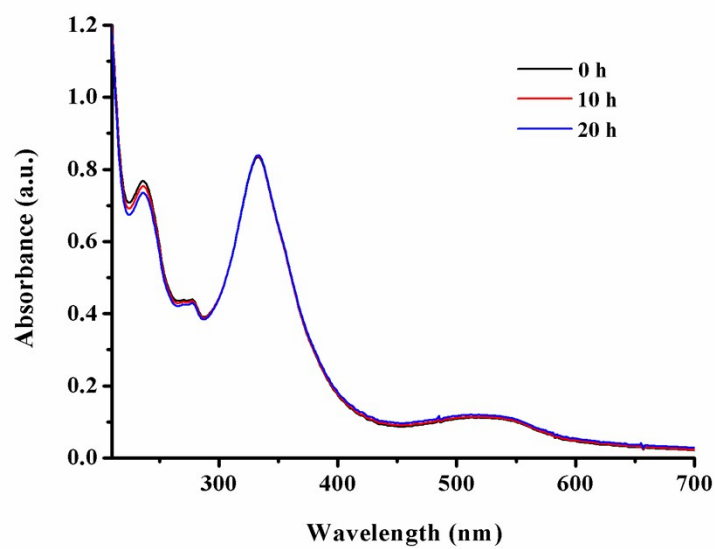

**Figure S12.** UV-vis absorption spectra of **2** in  $\text{CF}_3\text{SO}_3\text{H}$  aqueous solution (pH = 1.0) over a 20 h period.

**Table S1. Summary of the Crystal Data for 1**

| <b>1</b>                                        |                                                                  |
|-------------------------------------------------|------------------------------------------------------------------|
| Empirical formula                               | C <sub>31</sub> H <sub>42</sub> N <sub>6</sub> O <sub>9</sub> Ru |
| Formula weight                                  | 743.77                                                           |
| Temperature/K                                   | 296(2)                                                           |
| Crystal system                                  | monoclinic                                                       |
| space group                                     | Cc                                                               |
| a/Å                                             | 14.819(2)                                                        |
| b/Å                                             | 25.424(3)                                                        |
| c/Å                                             | 29.317(5)                                                        |
| $\alpha$ /°                                     | 90                                                               |
| $\beta$ /°                                      | 99.017(2)                                                        |
| $\gamma$ /°                                     | 90                                                               |
| Volume/Å <sup>3</sup>                           | 10909(3)                                                         |
| Z                                               | 12                                                               |
| $\rho_{\text{calc}}$ g/cm <sup>3</sup>          | 1.359                                                            |
| $\mu$ /mm <sup>-1</sup>                         | 0.488                                                            |
| F(000)                                          | 4632.0                                                           |
| Crystal size/mm <sup>3</sup>                    | 0.12 × 0.12 × 0.08                                               |
| Radiation                                       | MoK $\alpha$ ( $\lambda$ = 0.71073)                              |
| Theta range for data collection/°               | 3.204 to 50.054                                                  |
| Index ranges                                    | -17 ≤ h ≤ 16, -30 ≤ k ≤ 26, -34 ≤ l ≤ 34                         |
| Reflections collected                           | 23177                                                            |
| Independent reflections                         | 15693 [ $R_{\text{int}}$ = 0.0572, $R_{\text{sigma}}$ = 0.1045]  |
| Data/restraints/parameters                      | 15693/1127/1163                                                  |
| Goodness-of-fit on F <sup>2</sup>               | 0.930                                                            |
| Final R indexes [ $I > 2\sigma(I)$ ]            | $R_1$ = 0.0592, $wR_2$ = 0.1316                                  |
| Final R indexes [all data]                      | $R_1$ = 0.1035, $wR_2$ = 0.1506                                  |
| Largest diff. peak and hole / e Å <sup>-3</sup> | 0.58/-0.53                                                       |
| Flack parameter                                 | 0.34(5)                                                          |
